# Supplementary material
Source: HighWire-hosted journal article supplement (http://www.cmaj.ca/highwire/filestream/80273/field_highwire_adjunct_files/0/210053-res-1-at.pdf)
Supplement: 210053-res-1-at.pdf [file 210053-res-1-at.pdf]

**Appendix 1: Case report form**

# COVID-19

- 1) Hospitalized patients with acute COVID-19 (i.e., microbiologically confirmed SARS-CoV-2)
- 2) Hospitalized patients with paediatric inflammatory multisystem syndrome/Kawasaki disease temporally associated with COVID-19
- 3) Non-hospitalized patients with acute COVID-19 (i.e., microbiologically confirmed SARS-CoV-2) AND chronic comorbid conditions

**CANADIAN PAEDIATRIC SURVEILLANCE PROGRAM**

100-2305 St. Laurent Blvd.  
Ottawa, ON. K1G 4J8  
Tel: 613-526-9397, ext. 239  
Fax: 613-526-3332  
cpsp@cps.ca  
www.cpsp.cps.ca

**REPORTING INFORMATION**

Report number:  
Month of reporting:  
Province:  
Today's date:

**Please complete the following sections for the case identified above. If the information asked below is not readily available, please leave it blank. Strict confidentiality of information will be assured.**

**CASE DEFINITION FOR COVID-19 STUDY:**

Report any new patient less than 18 years of age (up to the 18<sup>th</sup> birthday) who meets one of the following three case definitions:

- (1) HOSPITALIZED with acute COVID-19 (i.e., microbiologically confirmed SARS-CoV-2)  
 (2) HOSPITALIZED with paediatric inflammatory multisystem syndrome (PIMS)/Kawasaki disease temporally associated

with COVID-19, defined as:

- Persistent fever (>38 degrees Celsius for 3 or more days) and elevated inflammatory markers (C-reactive protein [CRP], erythrocyte sedimentation rate [ESR], or ferritin)

**AND one or both of the following:**

- Features of Kawasaki disease (complete or incomplete)
- Toxic shock syndrome (typical or atypical)

**AND**

- No alternative etiology to explain the clinical presentation

**IMPORTANT NOTE: Patients should be reported regardless of SARS-CoV-2 status**

- (3) NON-HOSPITALIZED with acute COVID-19 (i.e., microbiologically confirmed SARS-CoV-2) AND at least one of the following chronic comorbid conditions:

|                                                                                                  |                                                    |
|--------------------------------------------------------------------------------------------------|----------------------------------------------------|
| < 12 months of age                                                                               | Asthma                                             |
| Obesity                                                                                          | Chronic lung disease                               |
| Congenital heart disease                                                                         | Chronic renal disease                              |
| Immunocompromising medications (high-dose steroids, * chemotherapy, biologics, immunomodulators) | Solid tumor or hematologic malignancy              |
| Solid organ transplant                                                                           | Bone marrow transplant                             |
| Primary or secondary immunodeficiency                                                            | Chronic neurologic or neurodevelopmental condition |
| Sickle cell disease or other chronic hematologic condition                                       | Diabetes                                           |
| Tracheostomy                                                                                     | Chronic rheumatologic or autoimmune disease        |
| Inflammatory bowel disease or other chronic gastrointestinal or liver disease                    | Genetic/metabolic disease                          |

\* Equivalent to at least 2 mg/kg or 20 mg/day of prednisone for at least two weeks

**PLEASE INDICATE CASE DEFINITION(S) BEING REPORTED (select all that apply):**

- Patient hospitalized with acute COVID-19
- Patient hospitalized with paediatric inflammatory multisystem syndrome (PIMS)/Kawasaki disease temporally associated with COVID-19
- Non-hospitalized patient with acute COVID-19 AND at least one chronic comorbid condition or < 12 months of age

**SECTION 1 – PATIENT INFORMATION**

1.1 Date of birth: \_\_\_\_ / \_\_\_\_ / \_\_\_\_  
                           DD    MM    YYYY

1.2 Sex:  Male  Female  Intersex

1.3 First 3 digits of patient's postal code: \_\_\_\_\_

- 1.4 Population groups (**select all that apply**):
- |                                                                                       |                                                                                       |                                                                |                                                |
|---------------------------------------------------------------------------------------|---------------------------------------------------------------------------------------|----------------------------------------------------------------|------------------------------------------------|
| <input type="checkbox"/> Arab                                                         | <input type="checkbox"/> Black                                                        | <input type="checkbox"/> Chinese                               | <input type="checkbox"/> Filipino              |
| <input type="checkbox"/> Japanese                                                     | <input type="checkbox"/> Korean                                                       | <input type="checkbox"/> Latin American                        | <input type="checkbox"/> White                 |
| <input type="checkbox"/> First Nations                                                | <input type="checkbox"/> Inuit                                                        | <input type="checkbox"/> Métis                                 | <input type="checkbox"/> Unknown               |
| <input type="checkbox"/> Southeast Asian<br>(e.g., Vietnamese,<br>Cambodian, Laotian) | <input type="checkbox"/> South Asian<br>(e.g., East Indian,<br>Pakistani, Sri Lankan) | <input type="checkbox"/> West Asian<br>(e.g., Iranian, Afghan) | <input type="checkbox"/> Other, specify: _____ |

**ASSOCIATION WITH COVID-19**

1.5 Has the patient tested positive for SARS-CoV-2?  Yes  No  Pending

*If yes, specify date:* \_\_\_\_/\_\_\_\_/\_\_\_\_  
                                  DD      MM      YYYY

***If no or pending, proceed to question 1.6.***

1.5.1 *If yes, what was the method of microbiologic diagnosis (select all that apply):*

- Polymerase chain reaction (PCR) or nucleic acid amplification
- Serology
- Rapid point-of-care test
- Other, specify: \_\_\_\_\_
- Unknown

1.5.2 *If yes, what type(s) of samples tested positive for SARS-CoV-2 (select all that apply):*

- Nasal-pharyngeal swab
- Nose swab
- Throat swab
- Endotracheal tube (ETT) aspirate
- Blood (PCR)
- Blood (serology- prior to any IVIG)
- Blood (serology- following IVIG)
- 

Stool

- Other, specify: \_\_\_\_\_
- Unknown

1.6 Has the patient travelled (outside of the province, or internationally) in the 12 weeks prior to symptom onset?

Yes  No  Unknown

1.6.1 *If yes, where?* \_\_\_\_\_

1.6.2 Date of return (if known): \_\_\_\_/\_\_\_\_/\_\_\_\_  
                                                  DD      MM      YYYY

1.7 Did the patient have any **known close contact** (household or non-household) with a microbiologically **confirmed** case of COVID-19 in the 8 weeks prior to symptom onset?  Yes  No  Unknown

1.7.1 *If yes, state relationship to patient (e.g., parent, teacher, friend):* \_\_\_\_\_

1.8 Did **any members in the household** become unwell with symptoms consistent with COVID-19 (**NOT** microbiologically confirmed) in the 8 weeks before the onset of symptoms in the patient?

Yes  No  Unknown

1.8.1 *If yes, state who (e.g., sibling, parent):* \_\_\_\_\_

1.9 Is it suspected that the patient contracted COVID-19 while in hospital or long-term care facility (nosocomial infection)?

Yes, in hospital  Yes, in long-term care  No  Unknown

**SECTION 2 – POTENTIAL RISK FACTORS**

- 2.1 Was the patient born prematurely?  Yes  No  Unknown
  - 2.1.1 *If yes*, gestational age at birth: \_\_\_\_\_ weeks \_\_\_\_\_ days
- 2.2 Does this patient vape?  Yes  No  Unknown
- 2.3 Does this patient smoke?  Yes  No  Unknown
  - 2.3.1 *If yes*, specify (e.g., cigarettes, cannabis, other): \_\_\_\_\_
- 2.4 Has the patient experienced housing insecurity in last 4 weeks?  Yes  No  Unknown
- 2.5 Are this patient’s routine immunizations up to date for age?  Yes  No  Unknown
  - 2.5.1 *If no*, list vaccines that are not up to date for age: \_\_\_\_\_
- 2.6 Did this patient receive the current year’s influenza vaccine?  Yes  No  Unknown
- 2.7 Did this patient have any other epidemiologic risk factors for acquiring SARS-CoV-2?  Yes  No  Unknown
  - 2.7.1 *If yes*, specify: \_\_\_\_\_

**SECTION 3 – MEDICAL COMORBIDITIES AND TREATMENT**

- 3.1 Does this patient have any chronic comorbid conditions?  Yes  No  Unknown

***If no or unknown, please proceed to Section 4.***

***If yes, select all that apply:***

|                                                                                                                                                                   |                                                                                                                                                                                                                                        |
|-------------------------------------------------------------------------------------------------------------------------------------------------------------------|----------------------------------------------------------------------------------------------------------------------------------------------------------------------------------------------------------------------------------------|
| <input type="checkbox"/> Asthma<br><input type="radio"/> Not requiring daily controller medication<br><input type="radio"/> Requiring daily controller medication | <input type="checkbox"/> Chronic lung disease<br><input type="checkbox"/> Cystic fibrosis<br><input type="checkbox"/> Bronchopulmonary dysplasia/chronic lung disease of prematurity<br><input type="checkbox"/> Other, specify: _____ |
| <input type="checkbox"/> Obesity<br>Indicate height _____ cm and weight _____ kg                                                                                  | <input type="checkbox"/> Diabetes mellitus (DM)<br><input type="radio"/> Insulin-dependant DM <input type="radio"/> Non-insulin DM                                                                                                     |
| <input type="checkbox"/> Congenital heart disease<br>Specify type if known: _____<br><input type="checkbox"/> Cardiomyopathy                                      | <input type="checkbox"/> Chronic renal disease<br>Specify type if known: _____<br>Dialysis dependent? <input type="radio"/> Yes <input type="radio"/> No                                                                               |
| <input type="checkbox"/> Immunocompromising medications in last 4 weeks<br>List medication(s): _____                                                              | <input type="checkbox"/> Malignancy (active and/or undergoing therapy)<br>Specify type if known: _____                                                                                                                                 |
| <input type="checkbox"/> Solid organ transplant<br>List organ and year of transplant: _____                                                                       | <input type="checkbox"/> Bone marrow transplant<br>List type and year of transplant: _____                                                                                                                                             |
| <input type="checkbox"/> Primary immunodeficiency<br>Specify diagnosis if known: _____                                                                            | <input type="checkbox"/> Secondary immunodeficiency<br>Specify: _____                                                                                                                                                                  |
| <input type="checkbox"/> Sickle cell disease or other chronic hematologic condition<br>Specify: _____                                                             | <input type="checkbox"/> Neurologic and/or neurodevelopmental condition(s)<br><input type="checkbox"/> Epilepsy<br><input type="checkbox"/> Cerebral palsy                                                                             |

|                                                                                                                                                                                                   |                                                                                                                |
|---------------------------------------------------------------------------------------------------------------------------------------------------------------------------------------------------|----------------------------------------------------------------------------------------------------------------|
|                                                                                                                                                                                                   | <input type="checkbox"/> Genetic disorder, specify:<br><hr/> <input type="checkbox"/> Other, specify:<br><hr/> |
| <input type="checkbox"/> Tracheostomy                                                                                                                                                             | <input type="checkbox"/> Chronic rheumatologic or autoimmune disease<br>Specify:<br><hr/>                      |
| <input type="checkbox"/> Inflammatory bowel disease<br>Specify type if known: _____<br><input type="checkbox"/> Other chronic gastrointestinal or liver condition<br>Specify type if known: _____ | <input type="checkbox"/> Genetic/metabolic disease<br>Specify type if known: _____                             |
| <input type="checkbox"/> Other, specify: _____                                                                                                                                                    |                                                                                                                |

**SECTION 4 – CLINICAL PRESENTATION – COMPLETE ONLY FOR PATIENTS WITH ACUTE COVID-19 (MICROBIOLOGICALLY CONFIRMED SARS-COV-2 INFECTION)**

**\*\* If you are reporting a case of a HOSPITALIZED PATIENT WITH PIMS/KAWASAKI DISEASE, PLEASE PROCEED TO SECTION 5.**

4.1 Was the patient hospitalized?  Yes  No

***If no, proceed to question 4.2.***

4.1.1 *If yes*, date of admission:      /      /       
                                            DD    MM    YYYY

4.1.2 *If yes*, was this patient admitted primarily for:

- Care related to symptoms consistent with acute COVID-19
- Care unrelated to symptoms consistent with acute COVID-19 (i.e., an incidental finding in a patient

admitted for another reason)

*If yes*, describe: \_\_\_\_\_

- Care required for purposes of isolation/infection control after testing positive for SARS-CoV-2 (i.e.,

supportive care for patients living in long-term care facilities and/or group homes)

*If yes*, describe: \_\_\_\_\_

- Humanitarian/compassionate reasons

*If yes*, describe: \_\_\_\_\_

4.2 Symptoms and signs at presentation (**select all that apply**):

- |                                      |                                               |                                           |                                                |
|--------------------------------------|-----------------------------------------------|-------------------------------------------|------------------------------------------------|
| <input type="checkbox"/> Fever       | <input type="checkbox"/> Respiratory distress | <input type="checkbox"/> Muscle aches     | <input type="checkbox"/> Conjunctivitis        |
| <input type="checkbox"/> Cough       | <input type="checkbox"/> Lethargy             | <input type="checkbox"/> Rash             | <input type="checkbox"/> Headache              |
| <input type="checkbox"/> Sore throat | <input type="checkbox"/> Seizures             | <input type="checkbox"/> Vomiting         | <input type="checkbox"/> Loss of smell         |
| <input type="checkbox"/> Runny nose  | <input type="checkbox"/> Coma                 | <input type="checkbox"/> Diarrhea         | <input type="checkbox"/> Loss of taste         |
| <input type="checkbox"/> Sneezing    | <input type="checkbox"/> Skin manifestations, | <input type="checkbox"/> Loss of appetite | <input type="checkbox"/> Other, specify: _____ |
|                                      | specify: _____                                |                                           |                                                |

4.3 Total duration of symptoms prior to diagnosis of COVID-19, if known \_\_\_\_\_ days

4.4 During the course of COVID-19 illness, did the patient experience any of the following? (**Select all that apply**):

|                                                                                                                                                                                                                                                                                                                                                                                              |                                                                                                                                                                  |                                                                                                                                                                                                                                                                                                                                                               |
|----------------------------------------------------------------------------------------------------------------------------------------------------------------------------------------------------------------------------------------------------------------------------------------------------------------------------------------------------------------------------------------------|------------------------------------------------------------------------------------------------------------------------------------------------------------------|---------------------------------------------------------------------------------------------------------------------------------------------------------------------------------------------------------------------------------------------------------------------------------------------------------------------------------------------------------------|
| <b><u>Respiratory:</u></b><br><input type="checkbox"/> Pneumonia<br><input type="checkbox"/> Bronchiolitis<br><input type="checkbox"/> Acute respiratory distress syndrome                                                                                                                                                                                                                   | <b><u>Inflammatory:</u></b><br><input type="checkbox"/> Cytokine storm/macrophage activating syndrome                                                            | <b><u>Neurologic:</u></b><br><input type="checkbox"/> Seizures<br><input type="checkbox"/> Stroke<br><input type="checkbox"/> Encephalitis<br><input type="checkbox"/> Encephalopathy<br><input type="checkbox"/> Acute necrotizing encephalopathy<br><input type="checkbox"/> Coma                                                                           |
| <b><u>Hematologic:</u></b><br><input type="checkbox"/> Coagulation dysfunction, Specify:<br>- Prothrombin time (PT)/international normalized ratio (INR) _____<br>- Partial thromboplastin time (PTT) _____<br>- D-dimer _____<br><input type="checkbox"/> Anemia<br><input type="checkbox"/> Lymphopenia<br><input type="checkbox"/> Neutropenia<br><input type="checkbox"/> Thrombocytosis | <b><u>Cardiac:</u></b><br><input type="checkbox"/> Hypotension<br><input type="checkbox"/> Acute cardiac dysfunction (myocarditis, pericarditis), specify: _____ | <b><u>Other:</u></b><br><input type="checkbox"/> Skin changes, specify: _____<br><input type="checkbox"/> Gastrointestinal symptoms (abdominal pain, vomiting, diarrhea) specify: _____<br><input type="checkbox"/> Hepatitis, specify: _____<br><input type="checkbox"/> Renal dysfunction, specify: _____<br><input type="checkbox"/> Other, specify: _____ |

**SECTION 5 – CLINICAL PRESENTATION – COMPLETE ONLY FOR PATIENTS HOSPITALIZED WITH PIMS/KAWASAKI DISEASE TEMPORALLY ASSOCIATED WITH COVID-19**

**\*\* If you are reporting a case of a PATIENT WITH ACUTE COVID 19 (MICROBIOLOGICALLY CONFIRMED SARS-COV-2 INFECTION, PLEASE PROCEED TO SECTION 6.**

5.1 Date of hospital admission: \_\_\_\_ / \_\_\_\_ / \_\_\_\_  
DD MM YYYY

5.2 Fever

5.2.1 Number of days of fever at diagnosis: \_\_\_\_\_ ○ Unknown

5.2.2 Total number of days of fever (START of fever until complete resolution): \_\_\_\_\_ ○ Unknown

5.3 Did this patient require hospitalization for acute COVID-19 in the past 8 weeks? ○ Yes ○ No ○ Unknown

5.4 Is this a Kawasaki disease re-occurrence? ○ Yes ○ No ○ Unknown

5.4.1 *If yes*, what was the month and year of the most recent previous diagnosis of Kawasaki disease?  
\_\_\_\_ month \_\_\_\_ year

5.5 **Clinical features**

Yes No

Unknown

5.5.1 Changes in the peripheral extremities (e.g., redness, swelling) ○ ○ ○

5.5.2 Rash ○ ○ ○

*If yes*, specify: \_\_\_\_\_

5.5.3 Bilateral bulbar conjunctival injection without exudate ○ ○ ○

- 5.5.4 Changes in the lips or oral cavity
- 5.5.5 Cervical lymphadenopathy >1.5 cm diameter
- 5.5.6 Abdominal pain/vomiting/diarrhea
- 5.5.7 Coagulation dysfunction  
*If yes, specify prothrombin time (PT)/international normalized ratio (INR),  
 partial thromboplastin time (PTT):\_\_\_\_\_*
- 5.5.8 Periungual desquamation
- 5.6 Did the patient present with clinical features consistent with shock/hypotension?  
 Yes  No  Unknown
- 5.7 **Laboratory features**
- 5.7.1 Highest C-reactive protein (CRP)\_\_\_\_\_
- 5.7.2 Highest erythrocyte sedimentation rate (ESR)\_\_\_\_\_
- 5.7.3 Highest ferritin\_\_\_\_\_
- 5.7.4 Highest D-dimer\_\_\_\_\_
- 5.7.5 Highest troponin\_\_\_\_\_
- 5.7.6 Highest liver enzymes (aspartate aminotransferase test [AST], alanine aminotransferase test [ALT],  
 lactate dehydrogenase [LDH], bilirubin)\_\_\_\_\_
- 5.7.7 Lowest sodium\_\_\_\_\_
- 5.7.8 Lowest albumin\_\_\_\_\_
- 5.7.9 Lowest platelet count (while an inpatient)\_\_\_\_\_
- 5.7.10 Highest platelet count (if patient seen in follow-up)\_\_\_\_\_
- 5.8 Was an echocardiogram performed?  Yes  No  Unknown
- If no or unknown, proceed to section 6.***
- 5.8.1 *If yes:*  
*(Note: If multiple echocardiograms were performed, please provide results from the study with the most severe findings)*
- Was coronary ectasia present?  Yes  No Maximum size (by z-score):  
 \_\_\_\_\_
- Was coronary dilation present?  Yes  No Maximum size (by z-score):  
 \_\_\_\_\_
- Were one or several aneurysms present?  Yes  No Maximum size (by z-score):  
 \_\_\_\_\_
- Was decreased heart function present?  Yes  No *If yes, specify ejection fraction:*  
 \_\_\_\_\_
- Were other cardiac findings present?  Myocarditis  Pericardial effusion  
 Valvular insufficiency  Other, specify:  
 \_\_\_\_\_

## SECTION 6 – CONCURRENT INFECTIONS AND IMAGING

- 6.1 Were there any other confirmed **concurrent viral** infections?  Yes  No  Unknown  
 6.1.1 *If yes, select all that apply:*  Respiratory syncytial virus  Influenza  Other, specify:  
 \_\_\_\_\_
- 6.2 Were there any **other concurrent** microbiologically confirmed infections?  Yes  No  Unknown  
 6.2.1 *If yes, specify:* \_\_\_\_\_
- 6.3 Were there any other concurrent **clinically diagnosed** infections?  Yes  No  Unknown  
 6.3.1 *If yes, specify:* \_\_\_\_\_
- 6.4 Did the patient have any of the following imaging? (**Select all that apply**):  
 Chest X-ray:  Yes  No *If yes, describe main findings:*  
 \_\_\_\_\_  
 CT scan:  Yes  No *If yes, describe anatomical location(s) and main findings:*  
 \_\_\_\_\_  
 MRI scan:  Yes  No *If yes, describe anatomical location(s) and main findings:*  
 \_\_\_\_\_  
 Other, specify: \_\_\_\_\_

**SECTION 7 – TREATMENT**

7.1 Treatment

|                                                                  | Yes                   | No                    | Name of product(s), if applicable |
|------------------------------------------------------------------|-----------------------|-----------------------|-----------------------------------|
| Bronchodilators                                                  | <input type="radio"/> | <input type="radio"/> |                                   |
| Azithromycin                                                     | <input type="radio"/> | <input type="radio"/> | N/A                               |
| Other antibiotics                                                | <input type="radio"/> | <input type="radio"/> | 1<br>2<br>3                       |
| Remdesivir                                                       |                       |                       |                                   |
| Other antivirals                                                 | <input type="radio"/> | <input type="radio"/> | 1<br>2<br>3                       |
| Steroids                                                         | <input type="radio"/> | <input type="radio"/> |                                   |
| Hydroxychloroquine                                               | <input type="radio"/> | <input type="radio"/> |                                   |
| Chloroquine                                                      | <input type="radio"/> | <input type="radio"/> |                                   |
| Immunoglobulin (IVIG)<br><i>If yes, specify number of doses:</i> | <input type="radio"/> | <input type="radio"/> |                                   |
| Aspirin                                                          | <input type="radio"/> | <input type="radio"/> |                                   |
| Anti-TNF                                                         | <input type="radio"/> | <input type="radio"/> |                                   |
| Anti-IL-1 (e.g., anakinra, canakinumab)                          | <input type="radio"/> | <input type="radio"/> |                                   |
| Anti-IL-6 (e.g., tocilizumab)                                    | <input type="radio"/> | <input type="radio"/> |                                   |
| Prophylactic anticoagulation                                     | <input type="radio"/> | <input type="radio"/> |                                   |
| Therapeutic anticoagulation                                      | <input type="radio"/> | <input type="radio"/> |                                   |



|                                                                            |                       |                       |  |
|----------------------------------------------------------------------------|-----------------------|-----------------------|--|
| Mechanical anticoagulation (e.g., antiembolism stockings, pneumatic boots) | <input type="radio"/> | <input type="radio"/> |  |
| Other (e.g., blood products, other antiplatelet therapies)                 | <input type="radio"/> | <input type="radio"/> |  |

7.2 Is this patient enrolled in a clinical trial and receiving novel therapy (e.g., convalescent plasma, antiretrovirals)?  Yes  No  Unknown

7.2.1 If yes, provide details: \_\_\_\_\_

7.3 What was the highest level of care required:  Managed at home  Inpatient ward  ICU

7.3.1 If admitted to ICU, what was the total duration of ICU admission? \_\_\_\_\_ days

Is the patient still in ICU?  Yes  No

7.4 Did the patient require any of the following forms of respiratory/other support? (Select all that apply):

- Increased baseline home oxygen
- Low-flow oxygen
- High-flow nasal canula
- Non-invasive ventilation (e.g., CPAP or BiPAP)
- Conventional mechanical ventilation
- High-frequency oscillatory ventilation
- Nitric oxide (NO)
- Extracorporeal membrane oxygenation (ECMO)
- Vasopressors
- Surgical thrombectomy
- Hemofiltration

7.5 Did the patient experience any other complications over the course of their illness?  Yes  No  Unknown

7.5.1 If yes, specify: \_\_\_\_\_

7.6 What was the final disposition of the patient?  Remains at home  Remains in hospital  
 Discharged home from hospital  Transferred to another facility  Died  Unknown

7.6.1 If patient was transferred to another facility, specify reason: \_\_\_\_\_

7.6.2 If patient died, specify cause of death: \_\_\_\_\_

## SECTION 8 – FOLLOW-UP

8.1 Additional details: \_\_\_\_\_  
 \_\_\_\_\_  
 \_\_\_\_\_  
 \_\_\_\_\_

I agree to be contacted by the CPSP for further information on this questionnaire.

I do not wish to be contacted by the CPSP for further for information on this questionnaire.

## LONG-TERM IMPACT

A separate study may be conducted to better understand the long-term impact and epidemiology of COVID-19 in children and youth. Do you agree to be contacted by the study team with follow-up questions about this case in the future?  Yes  No

(If yes, you agree to the CPSP releasing your contact information to the study team (led by Dr. Shaun Morris) for potential follow-up.)

**SECTION 9 – REPORTING PHYSICIAN**

First name \_\_\_\_\_ Surname \_\_\_\_\_

Address \_\_\_\_\_

City \_\_\_\_\_ Province or territory \_\_\_\_\_ Postal code \_\_\_\_\_

Telephone number \_\_\_\_\_ Fax number \_\_\_\_\_

E-mail \_\_\_\_\_ Date completed \_\_\_\_\_

**THANK YOU FOR COMPLETING THIS QUESTIONNAIRE. YOUR PARTICIPATION IS VITAL.**

**COVID-19 06/2020**
